# Supplementary material for: Pre- and Post-Pandemic Religiosity and Mental Health Outcomes: A Prospective Study
Source: MDPI journal article supplement (doi:10.3390/ijerph20116002), 2023-05-30
Supplement: s1 [file s1]

**Pre- and Post-Pandemic Religiosity and Mental Health  
Outcomes: A Prospective Study**

SUPPLEMENTAL SECTION – Contents and pages:

**Figure S1a:** Changes in religious importance (*RI*) from *T1–T2* according to *T1 RI* categories (p. 2).

**Figure S1b:** Changes in religious attendance (*RA*) from *T1–T2* according to *T1 RA* categories (p.2).

**Figure S1c:** Online religious attendance (*RA*) during pandemic (*T2*) according to *T1* in-person *RA* categories (p.3).

**Table S1a:** Changes in religious Importance (*RI*) from *T1–T2* according to *T1* religious importance categories (p.4).

**Table S1b:** Changes in religious attendance (*RA*) from *T1–T2*, according to *T1* religious attendance categories (p.4).

**Table S1c:** Online religious attendance (*RA*) according to *T1* religious attendance categories. (p.4)

**Table S2a:** Effects of demographic, phenomenological, and clinical group on likelihood of decrease in *RI* from *T1–T2* (p.5).

**Table S2b:** Effects of demographic, phenomenological, and clinical group on likelihood of decrease in *RA* from *T1–T2* (p.6).

**Table S3a:** Effects of demographic, phenomenological, and clinical group on likelihood of increase in *RI* from *T1–T2* (p.7).

**Table S3b:** Effects of demographic, phenomenological, and clinical group on likelihood of increase in *RA* from *T1–T2* (p.8).

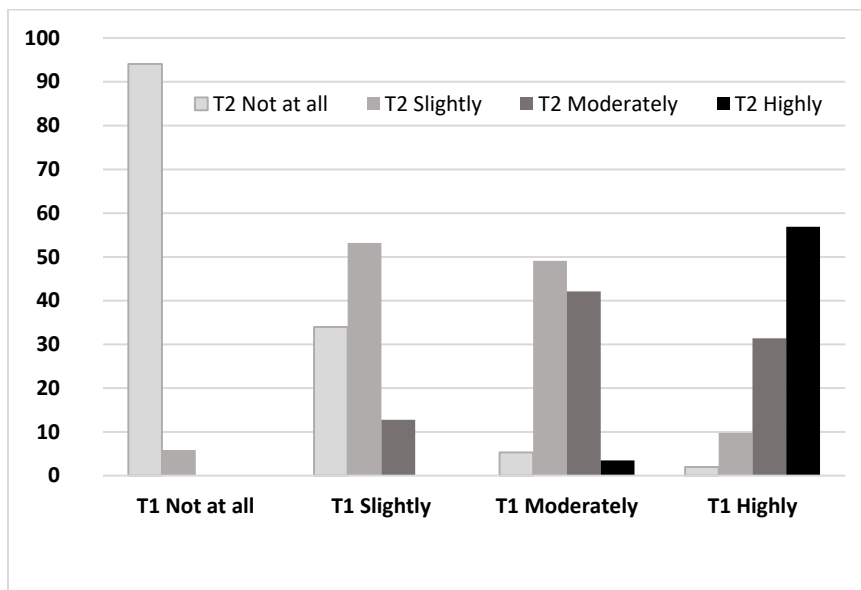

**Figure S1a.** Changes in religious importance (*RI*) from *T1-T2* according to *T1 RI* categories. Note. For *RI*, test of marginal homogeneity (MH) = 6.6,  $p < 0.001$ .

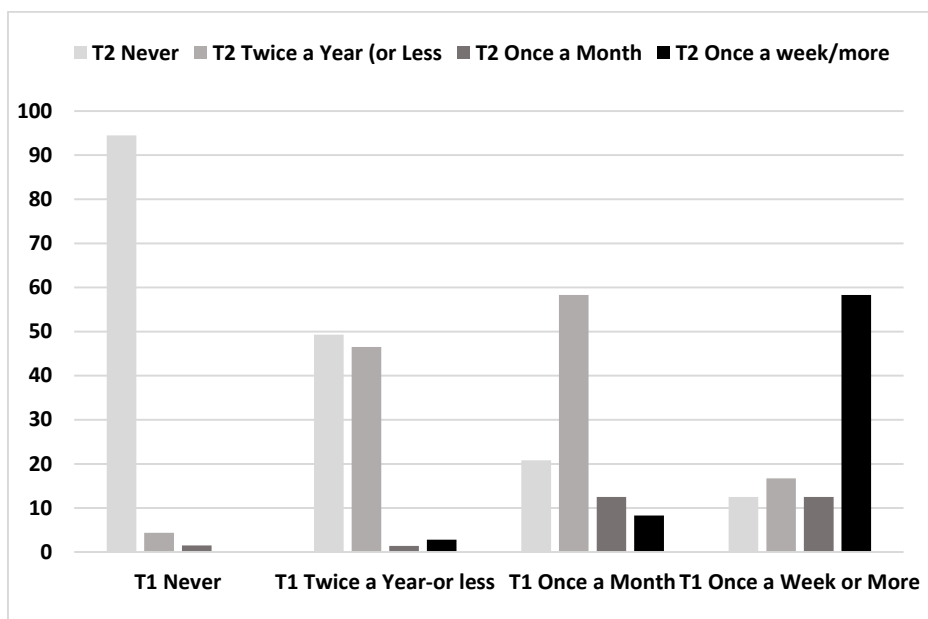

**Figure S1b.** Changes in religious attendance (*RA*) from *T1-T2* according to *T1 RA* categories, Note. For *RA*, test of marginal homogeneity (MH) = 5.8,  $p < 0.001$ .

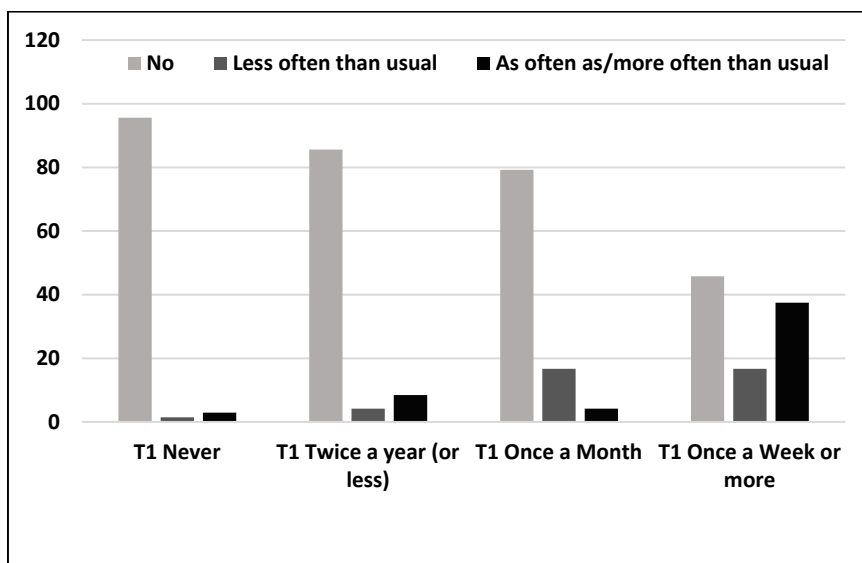

**Figure S1c.** Online religious attendance (RA) during pandemic (T2) according to T1 in-person RA categories.

**Table S1a.** Changes in Religious Importance (**RI**) from *T1-T2* according to *T1* religious importance categories. Religious Importance (*n*=189)

| Importance of Religion T1  | Importance of Religion T2     |                          |                               |                        |
|----------------------------|-------------------------------|--------------------------|-------------------------------|------------------------|
|                            | Not at all<br>( <i>n</i> =52) | Slightly ( <i>n</i> =60) | Moderately<br>( <i>n</i> =46) | Highly ( <i>n</i> =31) |
| Not at all ( <i>n</i> =34) | 32 (94.1)                     | 2 (5.9)                  | 0                             | 0                      |
| Slightly ( <i>n</i> =47)   | 16 (34.0)                     | 25 (53.2)                | 6 (12.8)                      | 0                      |
| Moderately ( <i>n</i> =51) | 3 (5.3)                       | 28 (49.1)                | 24 (42.1)                     | 2 (3.5)                |
| Highly ( <i>n</i> =51)     | 1 (2.0)                       | 5 (9.8)                  | 16 (31.4)                     | 29 (56.9)              |

**Table S1b.** Changes in Religious Attendance (**RA**) from *T1-T2*, according to *T1* religious attendance categories. Religious Attendance (*a*) *n*=187

| Religious Attendance<br>T1                | Religious Attendance T2 |                                      |                                |                                        |
|-------------------------------------------|-------------------------|--------------------------------------|--------------------------------|----------------------------------------|
|                                           | Never ( <i>n</i> =107)  | Twice a year/less<br>( <i>n</i> =54) | Once a Month<br>( <i>n</i> =8) | Once a week or<br>more ( <i>n</i> =18) |
| Never ( <i>n</i> =68)                     | 64 (94.1)               | 3 (4.4)                              | 1 (1.5)                        | 0                                      |
| Twice a year (or less)<br>( <i>n</i> =71) | 35 (49.3)               | 33 (46.5)                            | 1 (1.4)                        | 2 (2.8)                                |
| Once a month ( <i>n</i> =24)              | 5 (20.8)                | 14 (58.3)                            | 3 (12.5)                       | 2 (8.3)                                |
| Once a week/more<br>( <i>n</i> =24)       | 3 (12.5)                | 4 (16.7)                             | 3 (12.5)                       | 14 (58.3)                              |

**Table S1c.** Online Religious Attendance (**RA**) according to *T1* religious attendance categories.

| Religious <i>N</i> Attendance<br>T1       | Online Religious Attendance (During Pandemic)                |                                          |                                                   |
|-------------------------------------------|--------------------------------------------------------------|------------------------------------------|---------------------------------------------------|
|                                           | No/Does not attend<br>Religious Services<br>( <i>n</i> =157) | Less often than<br>usual ( <i>n</i> =12) | As often/More often than<br>usual ( <i>n</i> =18) |
| Never ( <i>n</i> =68)                     | 65 (95.6)                                                    | 1 (1.5)                                  | 2 (2.9)                                           |
| Twice a year (or less)<br>( <i>n</i> =71) | 62 (85.6)                                                    | 3 (4.2)                                  | 6 (8.5)                                           |
| Once a month ( <i>n</i> =24)              | 19 (79.2)                                                    | 4 (16.7)                                 | 1 (4.2)                                           |
| Once a week or more<br>( <i>n</i> =24)    | 11 (49.8)                                                    | 4 (16.7)                                 | 9 (37.5)                                          |

**Note.** Figures shown are *N*'s (and percentages) within each row (*T1* category) that endorse religious importance or attendance at *T2*. For religious importance, 15 cases deleted due to completion of *T1* SADS after 3/2020 (7), and missing *T1* SADS (8). **For religious attendance, 17** cases were deleted due to completion of *T1* SADS after 3/2020 (7), missing *T1* SADS (8), and missing data on religious attendance (2).

**Table S2a.** Effects of demographic, phenomenological and clinical group on likelihood to decrease *RI* from *T1-T2*.

| FACTORS                                                                                                                 | B (s.e.)            | P-value    | Odds Ratio (95%-Confidence Interval) |
|-------------------------------------------------------------------------------------------------------------------------|---------------------|------------|--------------------------------------|
| DEMOGRAPHICS                                                                                                            |                     |            |                                      |
| Female                                                                                                                  | 0.34 (0.31)         | .27        | 1.4 (0.8-2.6)                        |
| < Age 40 Years                                                                                                          | -0.23 (0.30)        | .45        | 0.8 (0.4-1.4)                        |
| Married                                                                                                                 | 0.10 (0.33)         | .74        | 1.1 (0.6-2.1)                        |
| Divorced/Widowed/Separated                                                                                              | -0.51 (0.51)        | .31        | 0.6 (0.2-1.6)                        |
| College degree higher                                                                                                   | 0.10 (0.30)         | .73        | 1.1 (0.6-2.0)                        |
| Hi MDD Risk                                                                                                             | 0.32 (0.31)         | .30        | 1.4 (0.8-2.5)                        |
| Past (only) psychiatric history                                                                                         | 0.44 (0.43)         | .31        | 1.6 (0.7-3.6)                        |
| Recent Psychiatric history                                                                                              | 0.09 (0.40)         | .83        | 1.1 (0.5-2.4)                        |
| Getting tested for COVID-19                                                                                             | 0.32 (0.31)         | .29        | 1.4 (0.7-2.5)                        |
| Know someone hospitalized (With COVID-19)                                                                               | 0.09 (0.32)         | .79        | 1.1 (0.6-2.1)                        |
| Know someone who died (from COVID-19)                                                                                   | <b>-0.83 (0.40)</b> | <b>.04</b> | <b>0.4 (0.2-1.0)</b>                 |
| COVID outbreak has made you feel unsafe/scared                                                                          | -0.16 (0.33)        | .63        | 0.9 (0.4-1.6)                        |
| Very/extremely satisfied with social support during pandemic                                                            | -0.19 (0.33)        | .55        | 0.8 (0.4-1.6)                        |
| Communicated often/fairly often in while with family or friends since beginning of pandemic (Vs. never/once in a while) | -0.17               | .64        | 0.8 (0.4-1.7)                        |
| Overall positive impact of pandemic on your and family                                                                  | 0.36 (0.51)         | .48        | 1.4 (0.5-3.9)                        |

**Note.** *RI* = belief in religious importance. Estimates obtained via binary logistic regression. Reference categories for demographic and clinical predictors are male, age 40+, married/remarried, less than college degree, low MDD risk, no psychiatric history. Reference categories for COVID experience predictors are “no.” Reference Category for outcome (change in religious importance) is increased/stayed the same.

**Table S2b.** Effects of demographic, phenomenological and clinical group on likelihood to decrease **RA** from T1-T2.

| FACTORS                                                                                                                 | B (s.e.)     | P-value | Odds Ratio (95%-Confidence Interval) |
|-------------------------------------------------------------------------------------------------------------------------|--------------|---------|--------------------------------------|
| DEMOGRAPHICS                                                                                                            |              |         |                                      |
| Female                                                                                                                  | -0.45 (0.31) | .15     | 0.6 (0.3-1.2)                        |
| < Age 40 Years                                                                                                          | -0.01 (0.31) | .97     | 1.0 (0.5-1.8)                        |
| Divorced/Widowed/Separated                                                                                              | -0.21 (0.50) | .68     | 0.8 (0.3-2.2)                        |
| Married/remarried                                                                                                       | -0.04 (0.34) | .91     | 1.0 (0.5-1.9)                        |
| College degree higher                                                                                                   | 0.47 (0.31)  | .13     | 1.6 (0.9-2.9)                        |
| Hi MDD Risk                                                                                                             | -0.53 (0.31) | .09     | 0.6 (0.3-1.1)                        |
| Past (only) psychiatric history                                                                                         | -0.34 (0.46) | .45     | 0.7 (0.3-1.7)                        |
| Recent Psychiatric history                                                                                              | 0.33 (0.40)  | .40     | 1.4 (0.6-3.1)                        |
| Getting tested for COVID-19                                                                                             | 0.20 (0.31)  | .51     | 1.2 (0.7-2.2)                        |
| Know someone hospitalized (With COVID-19)                                                                               | 0.35 (0.33)  | .29     | 1.4 (0.7-2.7)                        |
| Know someone who died (from COVID-19)                                                                                   | 0.14 (0.36)  | .69     | 1.2 (0.6-2.3)                        |
| COVID outbreak has made you feel unsafe/scared                                                                          | -0.58 (0.36) | .11     | 0.6 (0.3-1.1)                        |
| Very/extremely satisfied with social support during pandemic                                                            | -0.57 (0.23) | .70     | 0.9 (0.5-1.7)                        |
| Communicated often/fairly often in while with family or friends since beginning of pandemic (Vs. never/once in a while) | -0.43 (0.36) | .23     | 0.6 (0.3-1.3)                        |
| Overall positive impact of pandemic on your and family                                                                  | 0.34 (0.51)  | .50     | 1.4 (0.5-3.8)                        |

**Note. Note. RA=** religious attendance. Estimates obtained via binary logistic regression. Reference categories for demographic and clinical predictors are male, age 40+, married/remarried, less than college degree, low MDD risk, no psychiatric history. Reference categories for COVID experience predictors are “no.” Reference Category for outcome (change in religious importance) is increased/stayed the same.

**Table S3a.** Effects of demographic, phenomenological and clinical group on likelihood to *increase RI* from T1-T2

| FACTORS                                                                                                                 | B (s.e.)     | P-value | Odds Ratio (95%-Confidence Interval) |
|-------------------------------------------------------------------------------------------------------------------------|--------------|---------|--------------------------------------|
| DEMOGRAPHICS                                                                                                            |              |         |                                      |
| Female                                                                                                                  | -0.73 (0.66) | .27     | 0.5 (0.1-1.8)                        |
| < Age 40 Years                                                                                                          | 1.0 (0.71)   | .15     | 2.8 (0.7-11.0)                       |
| Divorced/Widowed/Separated                                                                                              |              |         |                                      |
| Married/remarried                                                                                                       |              |         |                                      |
| College degree higher                                                                                                   |              |         |                                      |
| Hi MDD Risk                                                                                                             | 0.97 (0.81)  | .23     | 2.6 (0.5-12.7)                       |
| Past (only) psychiatric history                                                                                         | 0.07 (0.94)  | .93     | 1.1 (0.2-6.8)                        |
| Recent Psychiatric history                                                                                              | 0.08 (0.86)  | .94     | 1.1 (0.2-5.8)                        |
| Getting tested for COVID-19                                                                                             | 0.31 (0.66)  | .65     | 1.4 (0.4-5.0)                        |
| Know someone hospitalized (With COVID-19)                                                                               | 0.34 (0.67)  | .61     | 1.4 (0.4-5.2)                        |
| Know someone who died (from COVID-19)                                                                                   | 0.83 (0.67)  | .21     | 2.3 (0.6-8.6)                        |
| COVID outbreak has made you feel unsafe/scared                                                                          | 0.92 (0.65)  | .16     | 2.5 (0.7-9.0)                        |
| Very/extremely satisfied with social support during pandemic                                                            | -0.43 (0.67) | .52     | 0.6 (0.2-2.4)                        |
| Communicated often/fairly often in while with family or friends since beginning of pandemic (Vs. never/once in a while) | 0.17 (0.81)  | .83     | 1.2 (0.2-5.8)                        |
| Overall positive impact of pandemic on your and family                                                                  | 0.12 (0.86)  | .89     | 1.1 (0.2-6.0)                        |

Note. *RI* = belief in religious importance. Estimates obtained via binary logistic regression. Reference categories for demographic and clinical predictors are male, age 40+, married/remarried, less than college degree, low MDD risk, no psychiatric history. Reference categories for COVID experience predictors are “no.” Reference Category for outcome (change in religious importance) is decreased/stayed the same.

**Table S3b.** Effects of demographic, phenomenological and clinical group on likelihood to *increase RA* from T1-T2.

| FACTORS                                                                                                                 | B (s.e.)     | P-value | Odds Ratio (95%-Confidence Interval) |
|-------------------------------------------------------------------------------------------------------------------------|--------------|---------|--------------------------------------|
| DEMOGRAPHICS                                                                                                            |              |         |                                      |
| Female                                                                                                                  | 0.42 (0.72)  | .56     | 1.5 (0.4-3.2)                        |
| < Age 40 Years                                                                                                          | -0.60 (0.72) | .40     | 0.5 (0.1-2.3)                        |
| Divorced/Widowed/Separated                                                                                              | 1.01 (1.02)  | .33     | 2.8 (0.4-20.6)                       |
| Married/remarried                                                                                                       | 0.63 (0.85)  | .46     | 1.9 (0.4-10.0)                       |
| College degree higher                                                                                                   | 0.36 (0.69)  | .60     | 1.4 (0.4-5.5)                        |
| Hi MDD Risk                                                                                                             | -1.22 (0.72) | .09     | 0.3 (0.1-1.2)                        |
| Past (only) psychiatric history                                                                                         | N/A*         | N/A     | N/A                                  |
| Recent Psychiatric history                                                                                              | N/A          | N/A     | N/A                                  |
| Getting tested for COVID-19                                                                                             | 0.60 (0.72)  | .40     | 1.8 (0.4-7.5)                        |
| Know someone hospitalized (With COVID-19)                                                                               | 0.54 (0.69)  | .44     | 1.7 (0.4-6.6)                        |
| Know someone who died (from COVID-19)                                                                                   | N/A          | N/A     | N/A                                  |
| COVID outbreak has made you feel unsafe/scared                                                                          | -1.25 (1.07) | .25     | 0.3 (0.03-2.3)                       |
| Very/extremely satisfied with social support during pandemic                                                            | 1.33 (1.07)  | .22     | 3.8 (0.5-30.8)                       |
| Communicated often/fairly often in while with family or friends since beginning of pandemic (Vs. never/once in a while) | 0.90 (1.08)  | .40     | 2.5 (0.3-20.3)                       |
| Overall positive impact of pandemic on your and family                                                                  | 0.10 (1.18)  | .94     | 1.1 (0.1-11.2)                       |

**Note.** *RA*= religious attendance. Estimates obtained via binary logistic regression. Reference categories for demographic and clinical predictors are male, age 40+, married/remarried, less than college degree, low MDD risk, no psychiatric history. Reference categories for COVID experience predictors are “no.” Reference Category for outcome (change in religious importance) is decreased/stayed the same.

\*N/A means that there were zero or too few cases within a group to compute estimates.
